# Supplementary material for: Oxidation engineering triggered peroxidase-like activity of VOxC for detection of dopamine and glutathione
Source: Royal Society of Chemistry journal article supplement (doi:10.1039/d3na00642e), 2023-01-01
Supplement: d3na00642e1.pdf [file d3na00642e1.pdf]

*Supporting information for:*

## Oxidation Engineering Triggered Peroxidase-like Activity of VO<sub>x</sub>C for Detection of Dopamine and Glutathione

*Huimin Jia<sup>a</sup>, Quan Liu<sup>a</sup>, Jingjing Si<sup>a</sup>, Yuyang Chen<sup>a</sup>, Guo Zhou<sup>a</sup>, Haihui Lan<sup>b</sup>, Weiwei He<sup>a\*</sup>*

<sup>a</sup> Key Laboratory of Micro-Nano Materials for Energy Storage and Conversion of Henan Province, Institute of Surface Micro and Nano Materials, College of Chemical and Materials Engineering, Xuchang University, Xuchang, Henan 461000, P. R. China

<sup>b</sup> Department of Chemistry, Massachusetts Institute of Technology, Cambridge, Massachusetts 02139, United States

**\*To whom Correspondence should be addressed**

E-mail: heweiweixcu@gmail.com (W. H.)

### **Notes**

The authors declare no competing financial interest.

**Table S1.** Elemental atomic percentages of  $V_4C_3$  and  $VO_xC$  calculated by XPS fitted spectra.

| Survey   | V 2p   | C 1s   | O 1s   |
|----------|--------|--------|--------|
| $V_4C_3$ | 18.86% | 55.91% | 25.23% |
| $VO_xC$  | 35.11% | 21.79% | 43.10% |

  

| V 2p     | V–C    | $V^{3+}$ | $V^{4+}$ | $V^{5+}$ |
|----------|--------|----------|----------|----------|
| $V_4C_3$ | 22.62% | 36.42%   | 29.15%   | 11.81%   |
| $VO_xC$  | 0%     | 25.74%   | 50.80%   | 23.46%   |

  

| O 1s     | V– $O_x$ | V–O    | C–O    | V–C–(OH) $_x$ |
|----------|----------|--------|--------|---------------|
| $V_4C_3$ | 22.21%   | 36.25% | 28.52% | 13.02%        |
| $VO_xC$  | 0%       | 75.36% | 15.44% | 9.20%         |

  

| C 1s     | V–C    | C–C    | C–H    | C–O    |
|----------|--------|--------|--------|--------|
| $V_4C_3$ | 23.89% | 32.52% | 37.68% | 5.91%  |
| $VO_xC$  | 0%     | 71.38% | 16.94% | 11.69% |

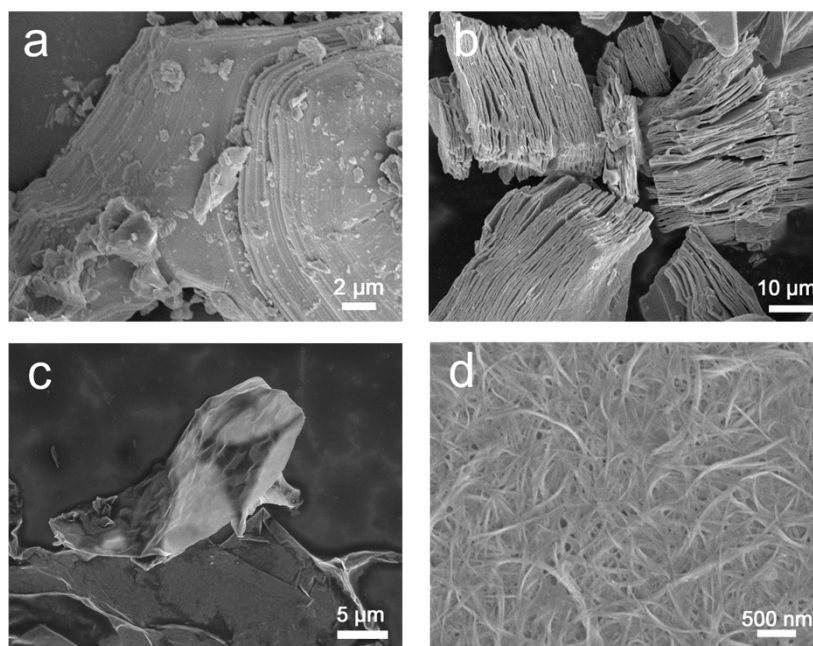

**Figure S1.** SEM image of MAX phase  $V_4AlC_3$ , multilayered  $V_4C_3$ , few layered  $V_4C_3$  NSs and  $VO_xC$ .

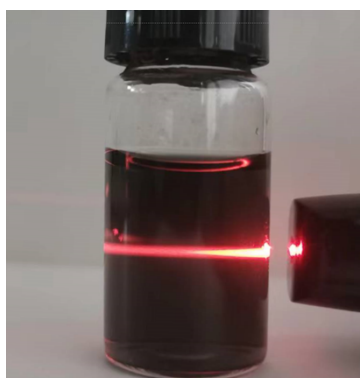

**Figure S2.** Dindar optical effect of  $V_4C_3$  NSs dilute solution under laser pointer irradiation.

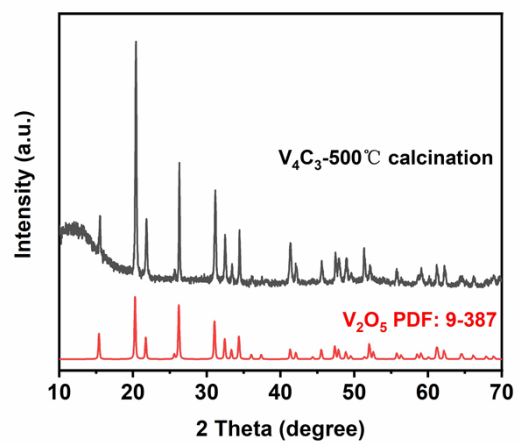

**Figure S3.** XRD pattern of V<sub>2</sub>O<sub>5</sub> after calcination of V<sub>4</sub>C<sub>3</sub> NSs.
